# Supplementary material
Source: Springer Nature journal article supplement (https://www.springermedizin.de/resource/supplementary/12916_2003_9_MOESM3_ESM.pdf/9599054)

### A. Azoospermia

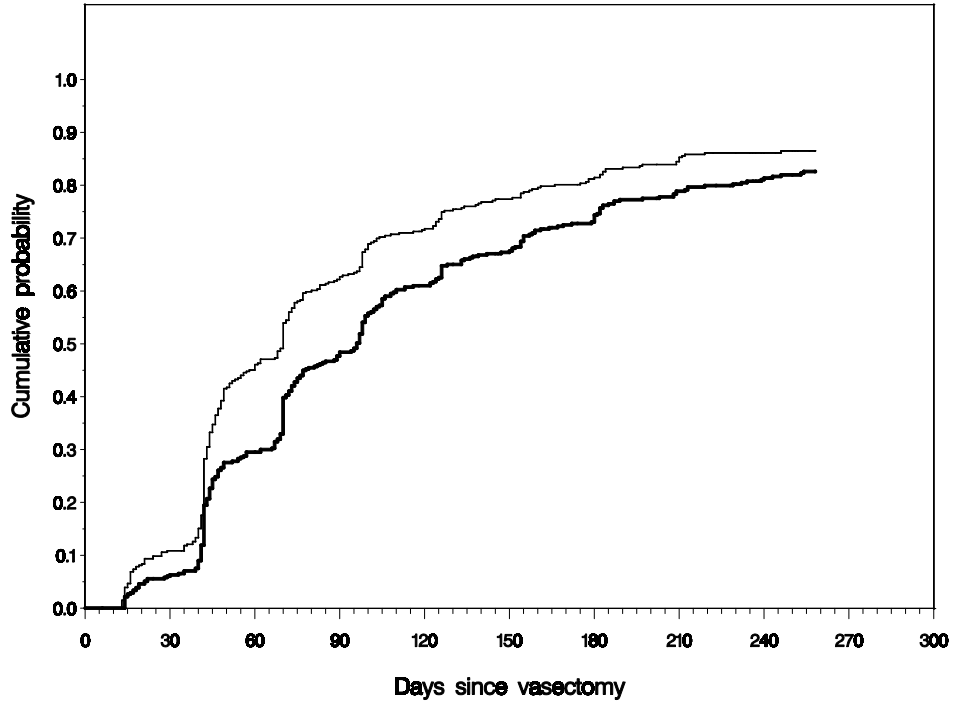

### B. Severe oligozoospermia

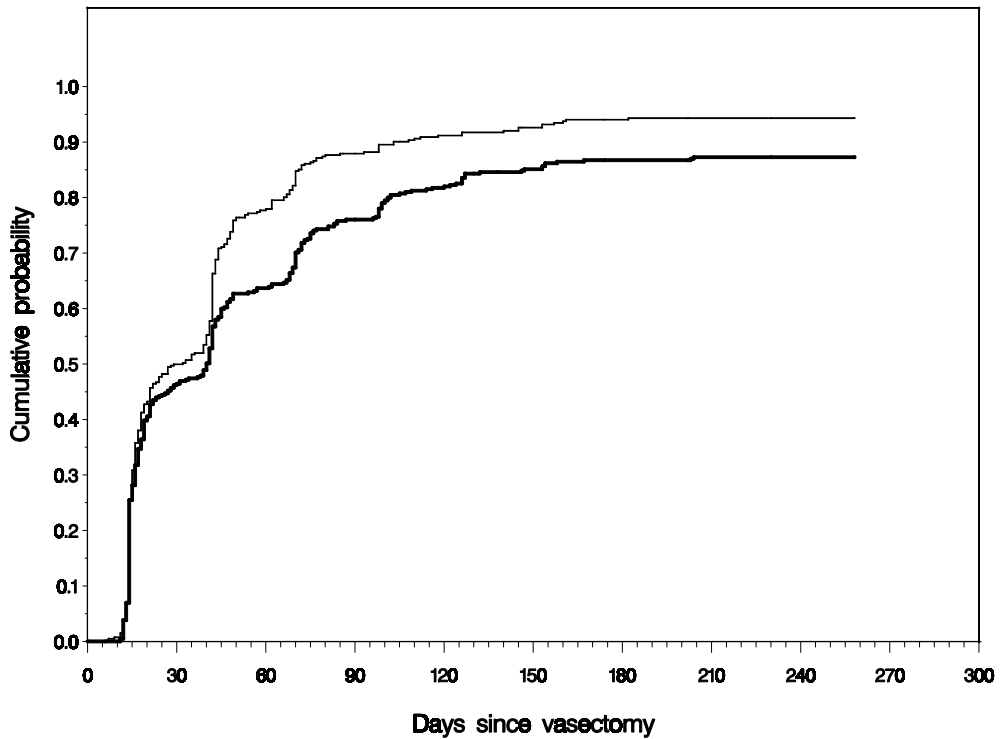

Supplement: MOESM3 [file 9599054]
